# Supplementary material for: Coupling an Electroactive Pseudomonas putida KT2440 with Bioelectrochemical Rhamnolipid Production
Source: PubMed Central journal article supplement (PMC7763313; doi:10.3390/microorganisms8121959), 2020-12-10
Supplement: microorganisms-08-01959-s001.pdf [file microorganisms-08-01959-s001.pdf]

# Supplementary Materials

## Coupling an electroactive *Pseudomonas putida* KT2440 with bioelectrochemical rhamnolipid production

Theresia D. Askitosari<sup>1#</sup>, Carola Berger<sup>2#</sup>, Till Tiso<sup>1</sup>, Falk Harnisch<sup>3</sup>, Lars M. Blank<sup>1</sup> and Miriam A. Rosenbaum<sup>2,4\*</sup>

# These authors contributed equally.

<sup>1</sup> Institute of Applied Microbiology – iAMB, Aachen Biology and Biotechnology – ABBt, RWTH Aachen University, 52074 Aachen, Germany.

<sup>2</sup> Department of Environmental Microbiology, Leibniz Institute for Natural Product Research and Infection Biology – Hans Knöll Institute, 07745 Jena, Germany.

<sup>3</sup> Helmholtz Centre for Environmental Research – UFZ, 04318 Leipzig, Germany

<sup>4</sup> Faculty of Biological Sciences, Friedrich Schiller University Jena, 07745 Jena, Germany.

\* Correspondence: miriam.rosenbaum@leibniz-hki.de; Tel.: +49-3641-532-1120

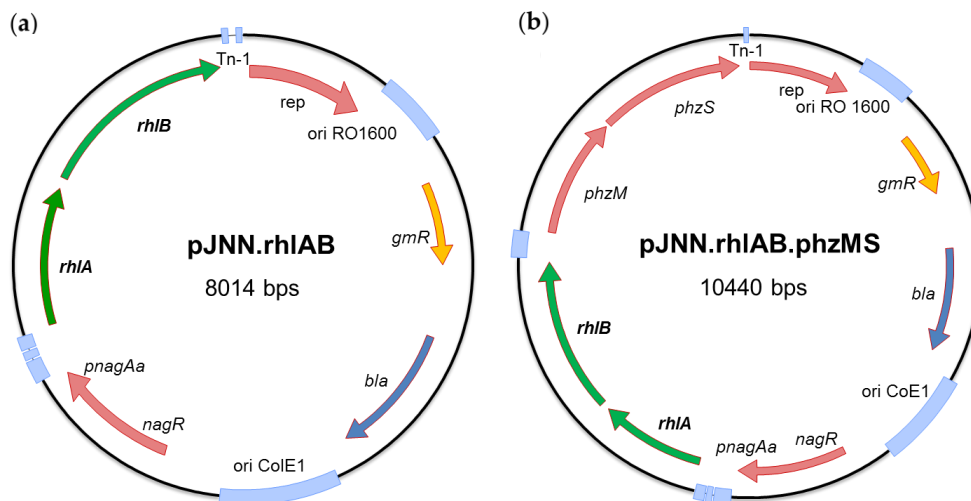

**Figure S1:** Constructed vectors expressing genes for mono-rhamnolipid- and phenazine synthesis. (a) pJNN.rhlAB, expressing the *rhlA* and *rhlB* genes from *P. aeruginosa* PAO1; (b) pJNN.rhlAB.phzMS, expressing the *rhlA*, *rhlB*, *phzM*, and *phzS* genes from *P. aeruginosa* PAO1. Both plasmids also contain the following elements: the gentamycin resistance cassette (*gmR*) for *Pseudomonas*, the ampicillin resistance cassette for *E.coli* (*bla*), the terminator (*Tn-1*), the origin of replication (*oriRO1600* for *Pseudomonas* and *oriColE1* for *E.coli*), and the salicylate-induced promoter (*pnagAa/nagR*).

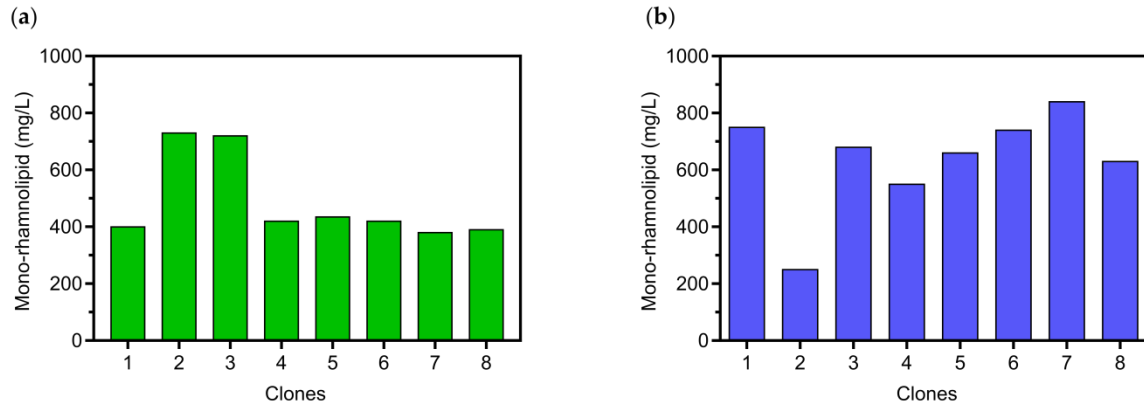

**Figure S2:** Heterologous rhamnolipid production of eight independent *P. putida* KT2440 clones cultivated in a micro-cultivation platform in LB media for 24 hours. (a) *P. putida* RL (carrying the pJNN.rhlAB plasmid); (b) *P. putida* RL-MS (carrying the pJNN.rhlAB.phzMS plasmid).

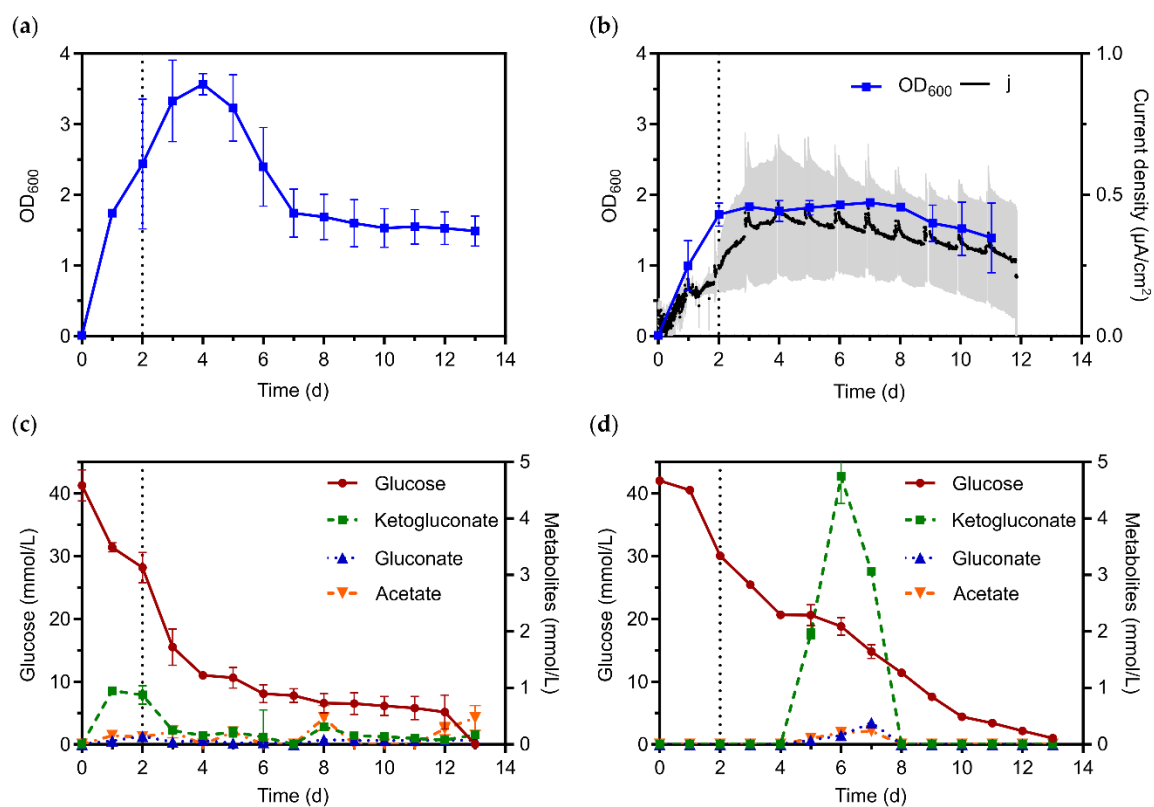

**Figure S3:** *P. putida* RL cultivation in 500-ml benchtop bioelectrochemical systems at open circuit ((a) & (c)) and with ((b) & (d)) an applied potential of 0.2 V (vs. Ag/AgCl). The reactors were actively aerated for the first 48 h with 30 mL/min followed by passive aeration of the headspace through open vent filters (dotted vertical line) (n=3). Rhamnolipids could not be detected.

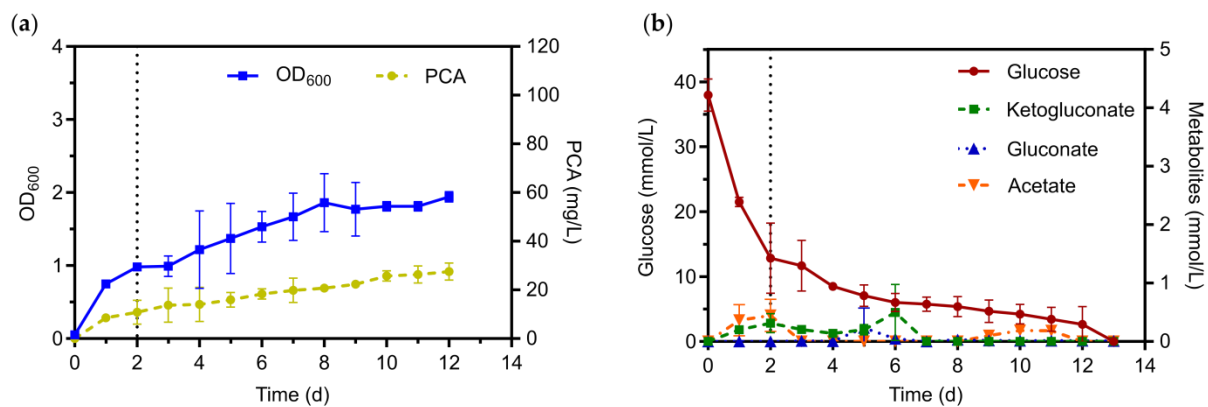

**Figure S4:** *P. putida* RL-PCA cultivation in 500-ml benchtop bioelectrochemical systems at open circuit potential. The reactors were actively aerated for the first 48 h with 30 mL/min followed by passive aeration of the headspace through open vent filters (dotted vertical line) (n=3). Rhamnolipids could not be detected.

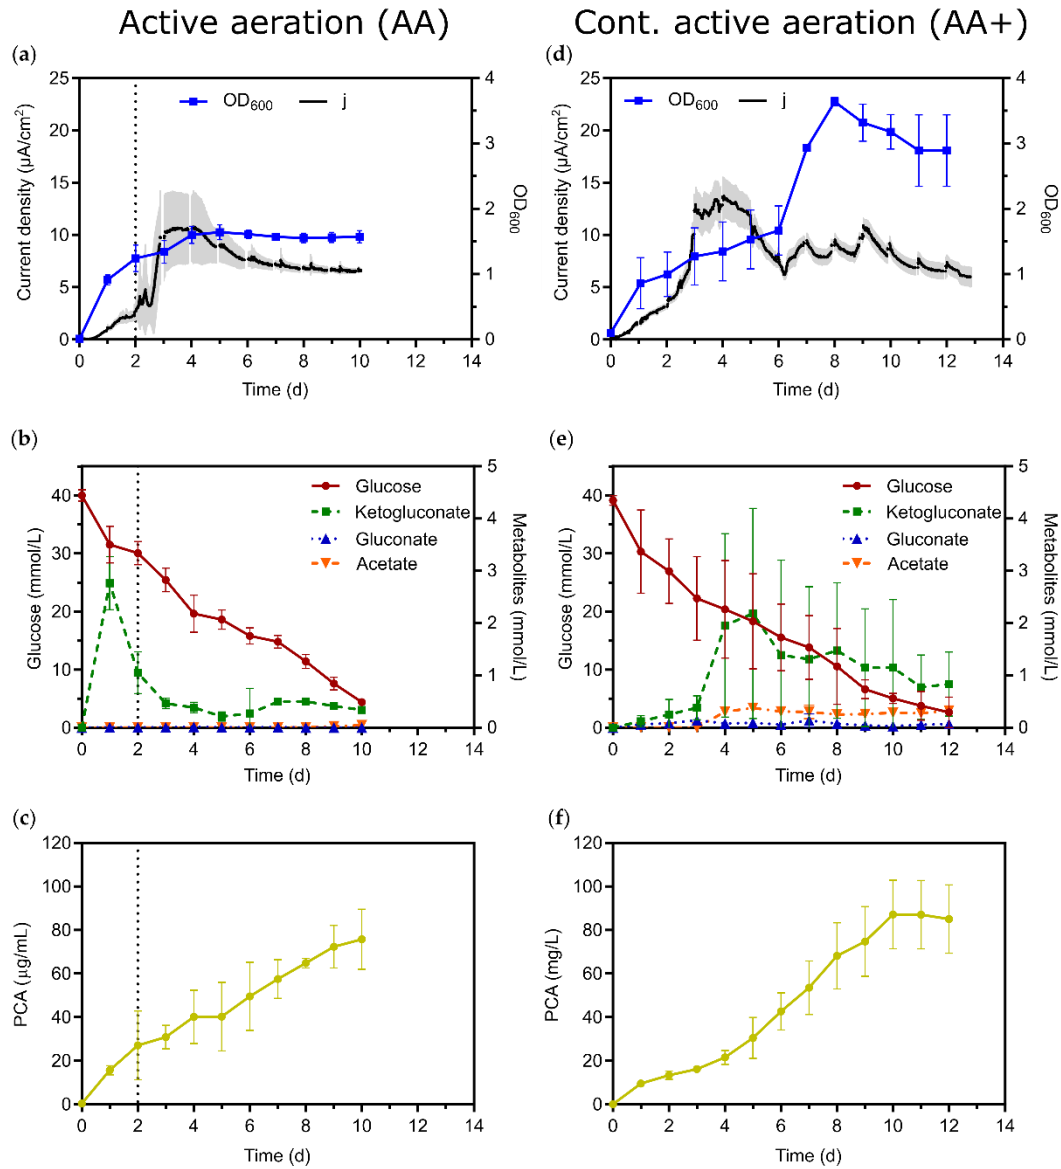

**Figure S5:** *P. putida* RL-PCA cultivations in 500-ml benchtop bioelectrochemical systems at an applied potential of 0.2 V (vs. Ag/AgCl). (a)-(c): The reactors were actively aerated for the first 48 h with 30 mL/min followed by passive aeration of the headspace through open vent filters (dotted vertical line) ( $n=3$ ). (d)-(e) The reactors were actively aerated throughout the entire experiment at a flow rate of 50 mL/min ( $n=3$ ). Rhamnolipids could not be detected.

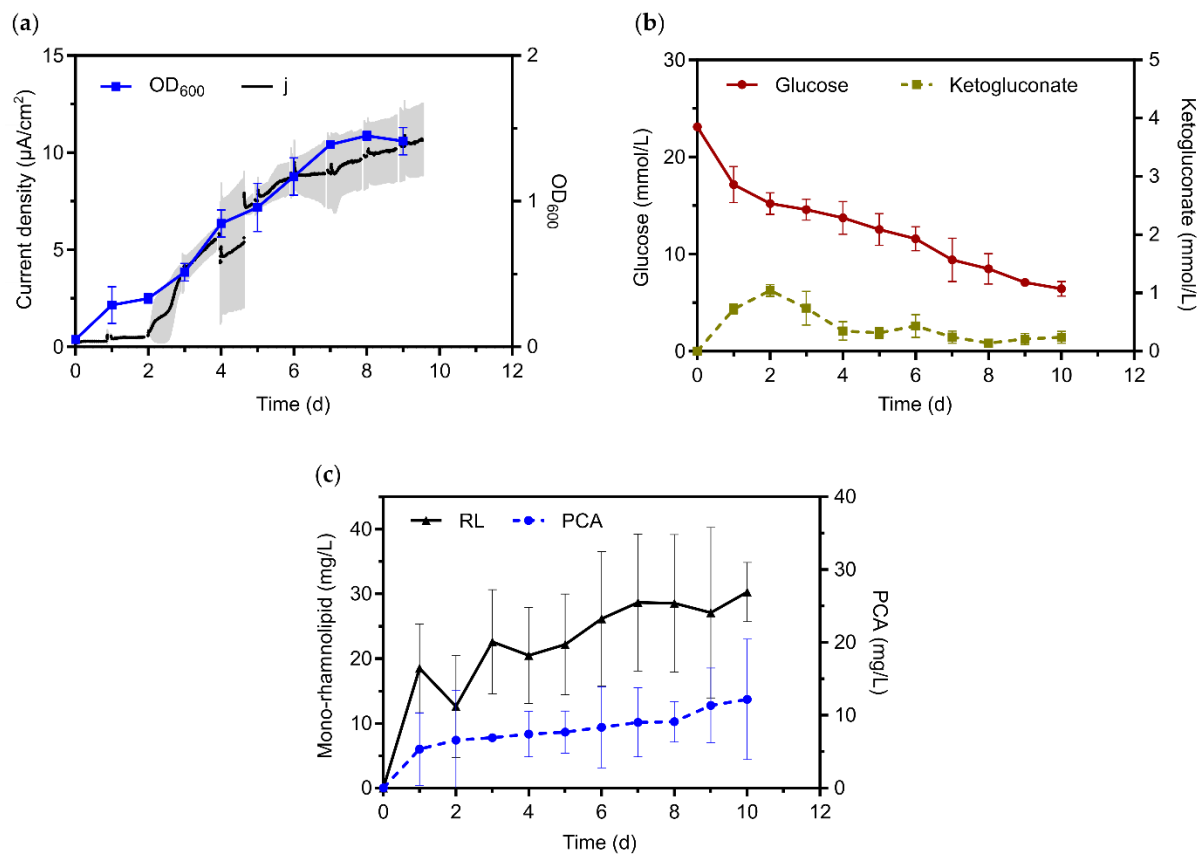

**Figure S6:** Repetition of passively aerated 500-ml benchtop bioelectrochemical systems of *P. putida* RL-PCA at an applied potential of 0.2 V (n=3), showing data for cell density (OD<sub>600</sub>) and current production (a), glucose consumption and 2-ketogluconate production (b), formation of PCA and rhamnolipids (RL) (c).

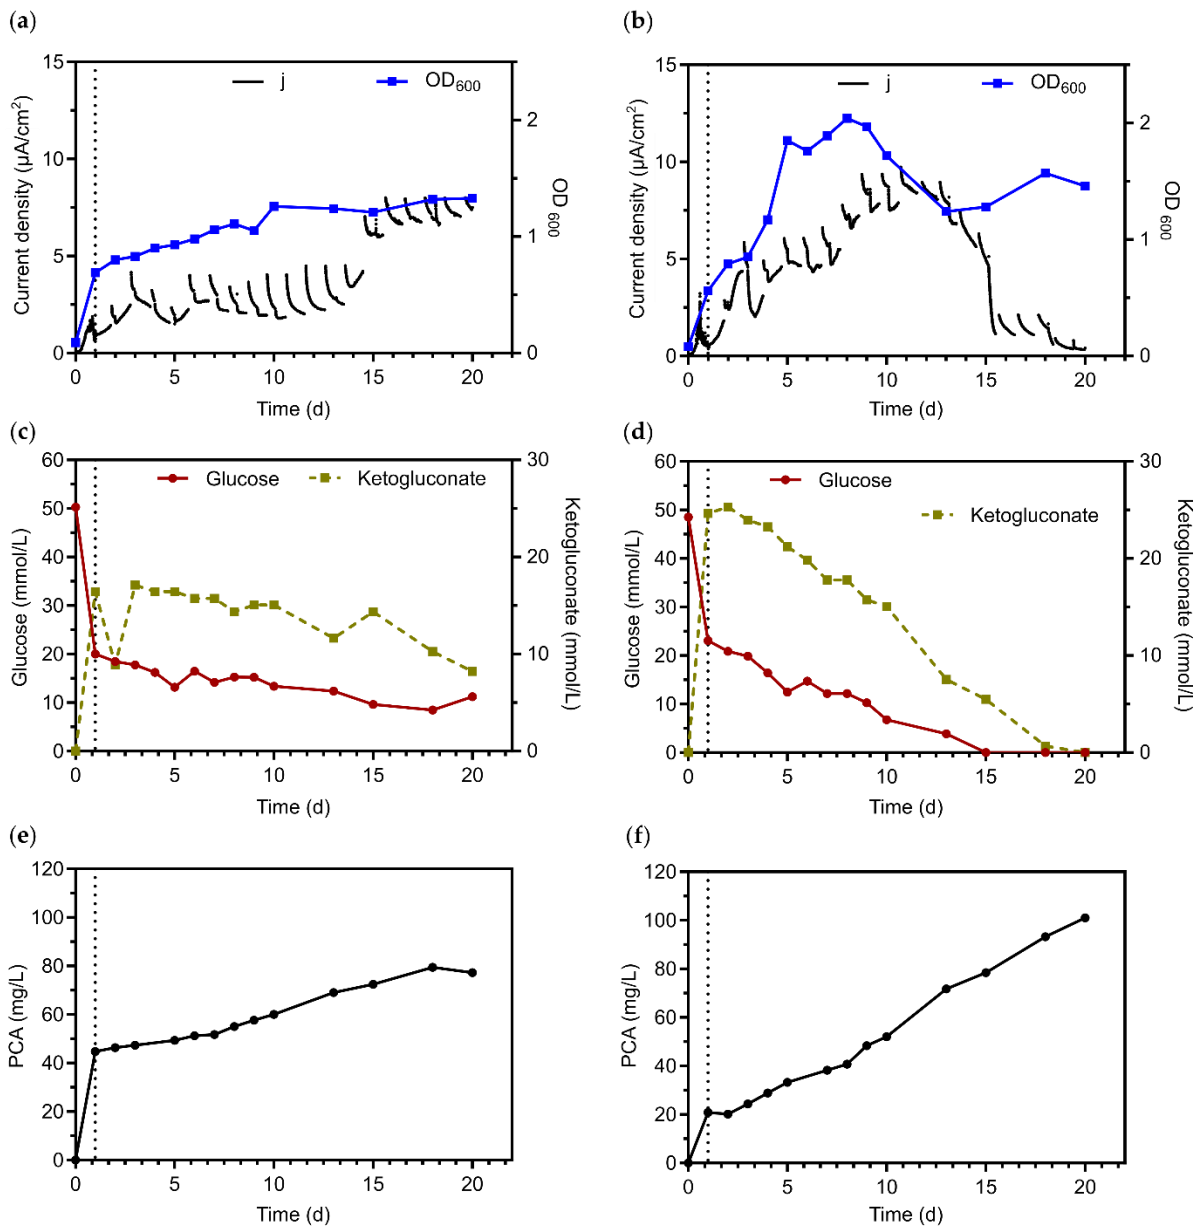

**Figure S7:** Duplicate bioelectrochemical systems 1-L electrobioreactor of *P. putida* RL-PCA at an applied potential of 0.2 V, showing data for cell density ( $\text{OD}_{600}$ ) and current production ((a) & (b)), glucose consumption and 2-ketogluconate production ((c) & (d)), as well as formation of PCA ((e) & (f)). The reactors were actively aerated for the first 24 h of the experiment and afterwards operated under passive aeration (dotted line). Rhamnolipids could not be detected.

**Table S1:** Primers used for tailoring heterologous rhamnolipid-producing *P. putida* with phenazine production.

| No | Primer                  | Sequence 5'                                | Function                                                                                                                                                     |
|----|-------------------------|--------------------------------------------|--------------------------------------------------------------------------------------------------------------------------------------------------------------|
| 1  | <i>rhlAB</i> -f         | GTACCGAATTCCTCGAGTGGG<br>CTCAACCTGGGAACTG  | amplifying the <i>rhlAB</i> genes from PAO1, containing a Xba1 restriction site with overlapping regions for Gibson assembly to the pJNN plasmid backbone    |
| 2  | <i>rhlAB</i> -r         | CCGACGTCGCATGCTCCTCAC<br>CGCTACACAGGAAATTC |                                                                                                                                                              |
| 3  | <i>rhlAB.MS</i> -f      | GTCTTTTTTCGGCCGCGTACCA<br>GGAGGAGAGATG     | amplifying the <i>rhlAB</i> genes from PAO1, containing a Xba1 restriction site with overlapping regions for Gibson assembly to the pJNN.MS plasmid backbone |
| 4  | <i>rhlAB.MS</i> -r      | CTGGATCTGGCCTAGGACTCT<br>AGAATTCAGGACGC    |                                                                                                                                                              |
| 5  | CP. <i>rhlAB</i> -f     | AGATGCGGCGCGAAAGTCTG                       | amplifying part of the <i>rhlA</i> gene up to the <i>nagR/pNagAa</i> promoter region of the pJNN plasmid backbone (colony PCR verification)                  |
| 6  | CP. <i>rhlAB</i> -r     | CGCGCCTGCTCGTATTCGCC                       |                                                                                                                                                              |
| 7  | CP.M+S. <i>rhlAB</i> -f | CTAGGCCAGATCCAGCGG                         | amplifying part of the <i>rhlA</i> gene up to the <i>nagR/pNagAa</i> promoter region of the pJNN.MS plasmid backbone (colony PCR verification)               |
| 8  | CP.M+S. <i>rhlAB</i> -r | GCGGCCGAAAAAAGACCCGC                       |                                                                                                                                                              |
| 9  | Seq_ <i>rhlA</i>        | TGGCCGAACATTTCAACGTG                       | sequencing of the <i>rhlA</i> gene                                                                                                                           |
| 10 | Seq_ <i>rhlB</i>        | CTGTTCGACGGCAGTATCCC                       | sequencing the <i>rhlB</i> gene                                                                                                                              |
